# Supplementary material
Source: publisher figshare collection journal article supplement (https://tandf.figshare.com/ndownloader/files/21296469)
Supplement: Supplementary file 1 [file 21296469]

**Progress and future prospects in biochar composites: application and reflection in the soil environment**

*Sandip Mandal1, Shengyan Pu1, 2 [[1]](#footnote-1)*, Sangeeta Adhikari3, Hui Ma1, 4, Do-Heyoung Kim3, Yingchen Bai2, Deyi Hou5*

*1State Key Laboratory of Geohazard Prevention and Geoenvironment Protection (Chengdu University of Technology), 1#, Dongsanlu, Erxianqiao, Chengdu 610059, Sichuan, P. R. China.*

***Email:*** *pushengyan@gmail.com; pushengyan13@cdut.cn, sandipmandal9@gmail.com*

*2State Key Laboratory of Environmental Criteria and Risk Assessment, Chinese Research Academy of Environmental Sciences, Beijing 100012, P. R. China.* ***Email:*** *baiyc@craes.org.cn*

*3 School of Chemical Engineering, Chonnam National University, 77, Yongbong-ro, Buk-gu, Gwangju, Korea.* ***Email:*** *Adhikari.sangeeta8@gmail.com, kdhh@chonnam.ac.kr*

*4Department of Plant and Environmental Sciences, University of Copenhagen, Thorvaldsensvej 401871 Frederiksberg, Denmark.* ***Email:*** *huima@plen.ku.dk*

*5School of Environment, Tsinghua University, Beijing 100084, China.* ***Email:*** *houdeyi@tsinghua.edu.cn*

**Supplementary Materials**

**Table S1. Recent progress in biochar and biochar composites and environmental applications**

| ***Biochar composites*** | ***Biomass*** | ***Agents/ metal oxides/ Nanomaterials*** | ***Development conditions*** | ***Surface area***  ***/N2 (m2/g)*** | ***Basic properties*** | ***Contaminant/Application area*** | ***Ref.*** |
| --- | --- | --- | --- | --- | --- | --- | --- |
| ***Pre-Pyrolysis*** | | | | | | | |
| magnetic biochar/ colloidal Nano sized γ-Fe2O3 particles | 1. Cotton wood 2. Pine wood | Ferric chloride | 600°C /1h | - | - | As(V) (Aqueous) | (Ming Zhang et al., 2013) |
| Novel graphene/biochar composite | Wheat straw | Graphene-pretreated biomass | 600°C /1h | G/BC-1%- 17.3 | - | 1. Hg(II) 2. Phenanthrenei   (Aqueous) | (Tang, Lv, Gong, & Huang, 2015) |
| HC-SDBS-CNT and BC-SDBS-CNT | 1. Hickory chips 2. sugarcane bagasse | CNTs | 600°C /1h | 1. HC-SDBS-CNT -359 2. BC-SDBS-CNT -336 | 1. HC-SDBS-CNT -77.69 2. BC-SDBS-CNT -84.30 | 1. Pb(II) 2. Sulfapyridine   (Aqueous) | (Inyang, Gao, Zimmerman, Zhou, & Cao, 2015)([Inyang et al., 2015](#_ENREF_7)) |
| Biochar-supported magnetic MnFe2O4 nanocomposite | corn straw | egg white  Fe(NO3)3·9H2O  Mn(NO3)2 | 500 °C/5h | BC/FM- 38.05 | - | Pb(II)-154.94 Cd(II)-127.83 | (L. Zhang et al., 2019) |
| CS450 and ADPCS450 | Corn straw | without and with ammonium dihydrogen phosphate (ADP) | 450°C /4h | 1. CS450-44.966 2. ADPCS-450356.010 | 1. CS450-75.17 2. ADPCS-67.07 | Atrazine  (Aqueous) | (Zhao et al., 2013) |
| Clay-biochar composites | 1. Bamboo, bagasse, 2. hickory chips | 1. Montmorillonite 2. Kaolinite suspensions | 600 °C | 1. Unmodified -375.5 2. Modified -408.1 | 1. Unmodified -80.9 2. Modified -83.3 | Methylene blue  (Aqueous) | (Yao et al., 2014) |
| Porous MgO-biochar nanocomposites | 1. sugar beet tailings (SBTs), 2. sugarcane bagasse (SB), 3. cottonwoods (CWs), 4. pine woods (PWs), 5. peanut shells (PSs) | Magnesium chloride hexahydrate (MgCl2⋅6H2O) | 600 °C /1 h | 1. SBT70.0 2. CW50.1 3. SB 122.5 4. PS18.9 5. PW2.8 | - | 1. Phosphorus 2. nitrates   (Aqueous) | (Ming Zhang, Gao, Yao, Xue, & Inyang, 2012) |
| Magnetite-modified water hyacinth biochar | water hyacinth | 1. Ferrous chloride 2. Ferric chloride | 250-450 °C/1 h | 1. MW2501- 69 2. MW4501-37.2 | - | As(Aqueous) | (F. Zhang, Wang, Xionghui, & Ma, 2016) |
| Magnetic biochar prepared from pinewood and natural hematite | loblolly pine | Hematite suspension | 600 °C/1h | 1. PB- 209.6 2. HPB- 193.1 | 1. PB-85.7% 2. HPB-51.7% | 1. As(Aqueous) | (Shengsen Wang, Gao, Zimmerman, et al., 2015) |
| Biochar/Mg–Al assembled nanocomposites | brown marine macro algae(Laminaria japonica) | Magnesium chloride | 600 °C/1h | 14.1 | - | phosphate (887 mg/ g) (Aqueous) | (K.-W. Jung, Jeong, Hwang, Kim, & Ahn, 2015) |
| Nano-cerium oxide wood chip biochar composites | Pine wood chip | CeCl3 | 600 °C/30 min | 1. WCC28 412 2. WCC21 297 3. WB 312 | 1. WCC28 35.8 2. WCC21 53.2 3. WB-85.6 | levofloxacin(Aqueous) | (S. Yi et al., 2018) |
| Magnetic biochar’s | Orange peel | 1. Ferrous chloride 2. Ferric chloride | 250°C, 400 °C /700 °C | MOP400-23.4 | MOP400-29.4% | 1. Naphthalene 2. p-nitro toluene 3. phosphates   (Aqueous) | (B. Chen, Chen, & Lv, 2011) |
| ***Post-Pyrolysis*** | | | | | | | |
| Magnetic oak wood and oak bark | oak wood and oak bark | Ferric sulfate  ferrous sulfate | 400~450°C / 30 min | 1. MOWBC-6.1 2. MOBBC-8.8 | MOWBC-69.025%  MOBBC-56.145% | 1. MOBBC- Pb2+: 30.2 and Cd2+: 7.4 mg/g  2. MOWBC- Pb2+ 10.13 and 2.87 mg/g  (Aqueous) | (Mohan, Kumar, Sarswat, Alexandre-Franco, & Pittman, 2014) |
| Manganese oxide-modified biochar’s | Pinewood | MnCl2·4H2O | 600°C /1h | 1. PB-209.6 2. MPB-463.1 3. BPB-67.4 | 1. PB-85.68 2. MPB-78.95 3. BPB-61.54 | 1. Pb(II) 2. As(V) (Aqueous) | (Shengsen Wang, Gao, Li, et al., 2015) |
| Biochar/AlOOH nanocomposite | Cottonwood | AlOOH | 600°C /1h | - | - | As(V) (Aqueous) | (Ming Zhang & Gao, 2013)([Zhang and Gao, 2013](#_ENREF_36)) |
| Ca and Fe modified biochar’s | Rice Husk | calcium oxide  iron powder <150 μm | 300 °C | - | - | 1. Arsenic (As5+) 2. chromium (Cr6+)   (Aqueous) | (Agrafioti, Kalderis, & Diamadopoulos, 2014) |
| Mg-biochar nanocomposite | Mg-enriched tomato leaves | potassium phosphate  monobasic (KH2PO4) | 600 °C | - | - | Phosphorus(Aqueous) | (Yao, Gao, Chen, & Yang, 2013) |
| magnetic biochar composites | Paper mill sludge | CTMB solution | 700°C | 1. Paper mill sludge-4.8 2. Biochar -67 3. ZVI-MBC-101.23 | - | Pentachlorophenol  (Aqueous) | (Devi & Saroha, 2014) |
| magnetic Biochar | 1. Nut shield 2. Wheat straw 3. grape stalk 4. grape husk 5. plum stone | iron oxide particles | 600°C /30min | 1. NSBC -365 2. WSBC-334 3. GSBC-80.5 4. GHBC-127 5. PSBC-363 | - | 1. Pb(II) 2. Cu(II)   (Aqueous) | (Trakal et al., 2016) |
| Aluminum-modified crop straw-derived biochar’s | 1. Rice straw, 2. peanut straw, 3. soybean straw | AlCl3 | 350 °C /4 h | 1. SSB-1.0 ± 0.2 2. PS-2.1 ± 0.5 3. RSS -19.3 ± 1.1 | 1. SSB-541 ± 3.3 g/kg 2. PS-410 ± 2.5 g/kg 3. RSS -425 ± 3.1 g/kg | As5+(Aqueous) | (Qian, Zhao, & Xu, 2013) |
| Chitosan-modified biochar’s | 1. Bamboo(BB-C) 2. sugarcane bagasse(BG-C) 3. hickory wood(HC-C) 4. peanut hull(PN-C) | chitosan homogenous suspension  NaOH (1.2%) solution | 600 °C/2h | 1. BB-C- 166.9 2. BG-C- 123.7 3. HC-C- 2.6 4. PN-C- 0.2 | 1. BB-C- 71.60 2. BG-C- 69.61 3. HC-C- 66.69 4. PN-C-65.40 | 1. Pb2+ 2. Cu2+ 3. Cd2+   (Aqueous) | (Zhou et al., 2013) |
| Magnetic Biochar Decorated with ZnS Nanocrystals | Rice hull | ZnS nanocrystals(NCs)  triethylene glycol  Fe(acac)3 | 275°C/0.5 h | - | - | Pb (II) 367.65 mg g–1  (Aqueous) | (Yan, Kong, Qu, Li, & Shen, 2015) |
| Iron oxides biochar | Eucalyptus leaf | ZnCl2  FeCl3·6H2O | 400°C /1h | 1. MELRC (ELBC)-473.50 2. ELBC-562.12 | 1. MELRC (ELBC)-38.38 2. ELBC-46.21 | Cr(VI) (Aqueous) | (Sheng-ye Wang et al., 2014) |
| Fe-Mn modified biochar composite | corn straw | KMnO4 | 600 °C/2 h | FMBC1 208.0 ± 1.2  FMBC27.53 ± 0.06 | 67.3 ± 0.2  53.8 ± 0.6 | As  (soil) | (Lin, Li, Liu, Qiu, & Song, 2019) |
| Mg−biochar nanocomposites | Sugar beet tailings | - | 600 °C /2h | - | DSTC-30.81%  STC -50.78% | Phosphorus(Aqueous) | (Yao et al., 2011) |
| Magnetic porous carbon from waste hydro char | rice-husk | acid and alkali | 449 -499 oC | 1. Acid-treated -46.8 2. Alkali-treated-117.8 | 1. Acid-treated C-43.6 2. Alkali-treated C-76.4 | TCE(Aqueous) | (Zhu et al., 2014)[1] |
| Fe-impregnated biochar | Hickory chips | Iron hydroxide particles | 600°C /2h | 16.0 | 84.7 | As(V) (Aqueous) | (Hu, Ding, Zimmerman, Wang, & Gao, 2015)([Xin et al., 2015](#_ENREF_32)) |
| MnO/NiO-biochar composite  Ni/Mn-LDH-modified biochar (NMMB) | loblolly pine | 1. Ni(NO3)2·6H2O 2. MnCl2 | 600°C /1h | 1. NMMF-125 2. NMMB-282.8 | 1. NMMF-55.14  2. NMMB-54.90 | As(V) (Aqueous) | (Shengsen Wang, Gao, & Li, 2016) |
| MnOx-loaded biochar | Corn straws | KMnO4 | 600 °C/3 h | 1. BC -61.0 2. 2.5%MBC 23.8 3. 10%MBC 3.18 4. 60%MBC 2.28 | 1. BC (85.3) 2. 2.5%MBC (79.7) 3. 10%MBC (73.0) 4. 60%MBC (48.6) | Cu2+(Aqueous) | (Song et al., 2014) |
| zinc-loaded pine cone biochar | Pine cone | Zn-OH | 500°C /1h | 1. Raw PC biochar-6.60 2. Zn-loaded PC biochar -11.54 | 1. Raw PC biochar- 67.88% 2. Zn-loaded PC biochar - 71.21% | As(III) (Aqueous) | (Van Vinh, Zafar, Behera, & Park, 2015)([Vinh et al., 2015](#_ENREF_22)) |
| Cobalt-coated adsorbent (Co-MBC) | Bamboo | CoO,Co3O4 | - | Co-MBC 263 | - | Cr(VI) (Aqueous) | (Y. Wang et al., 2012) |
| N-biochar and O-biochar | Pine chip | NaOH | 300°C /15 min | 1. N-biochar- 1360 2. O-biochar- 1151 | 1. N-biochar- 72.6 2. O-biochar- 83.8 | 1. Diclofenac, 2. naproxen 3. ibuprofen   (Aqueous) | (C. Jung et al., 2015) |
| Carbon nanotubes on low-cost bamboo biochar | Moso bamboo | CNTs | 800 °C/2 h | - | - | Pb(II) (Aqueous) | (Huang, Zhang, Wang, Lv, & Kang, 2012) |
| Fe-biochar (Fe-biochar), | Rice straw | FeCl2/NaClO | 450 °C/1 h | - | - | CD and As  (soil) | (D. Yin, Wang, Peng, Tan, & Ma, 2017) |
| Chemically modified biochar (Mg(OH)2) | Conocarpus wastes | Mg(OH)2 | 600°C/30 min | 154.9 | 76.18% | Fe(II) (Aqueous) | (Usman et al., 2013) |
| Modified Biochar’s Derived from Bamboo | Bamboo | KMnO4, HNO3, or NaOH | 550 °C | 1. BC-Raw-42.8 2. BC-KMnO4-27.2 3. BC-HNO3-0.5 4. BC-NaOH-0.4 5. BC-Heat-494.2 | 1. BC-Raw-63.5 2. BC-KMnO4-60.7 3. BC-HNO3-56.7 4. BC-NaOH-59.5 5. BC-Heat-70.7 | Furfural(Aqueous) | (Y. Li et al., 2014) |
| iron-coated biochar’s (IBs) | Wheat straw | FeCl3 .6H2O | 450 °C | 1. WB-9.47 2. 6HWB-14.58 3. DIB2-48.98 4. DIB4-138.56 5. DIB5-64.91 | 1. Wheat Straw -43.06% 2. WB -47.20% 3. 6HWB-47.93% 4. DIB2 -25.91% 5. DIB4 -27.14% 6. DIB5-17.29% | 1. Nitrate 2.47 mg/g 2. Phosphate16.58 mg/g   (Aqueous) | (J. H. Li et al., 2016) |
| Mongolian scotch pine tree sawdust char (MMSC) | Pine tree sawdust | Phosphoric acid | 550 °C /microwave method | 1. MSC-7.68 2. MMSC-389.5 | 1. MSC-59.76% 2. MMSC-61.93% | 1. 885 m/ kg for F− (Aqueous) | (Guan et al., 2015) |
| Environmental-friendly montmorillonite-biochar composites | bamboo powder | montmorillonite | 300~500°C /1h | 1. Bamboo-4.694 2. Biochar-400-2.272 3. MBC-300-9.844 4. MBC-350-13.399 5. MBC-400-19.928 6. MBC-450-26.233 7. MBC-500-18.046 | 1. Bamboo-48.31% 2. Biochar-400-76.05% 3. MBC-400-64.01% | 1. NH4+ 2. PO43−   (Aqueous) | (L. Chen et al., 2017) |
| CuO-MnOx-modified pinecone biochar | pinecones | hydrogen peroxide Mn(NO3)2  Cu(NO3)2·3H2O | 500 °C/ 90 min | 12%CuMn/HBC-320.98 | - | 1. Formaldehyde 2. elemental mercury   (Aqueous) | (Y. Yi et al., 2018) |
| Magnetic nano ferromanganese oxides modified biochar | pine sawdust | FeCl2  KMnO4 | 500 °C/ 2h | 1. BC-13.08 2. MBC-666.2 3. EBC-466.66 | - | tetracycline hydrochloride  (Aqueous) | (Liang et al., 2019) |
| Nanoscale zero-valent iron/magnetite carbon composites | Yellow pine | Fe(NO3)3 | 700, 800, 900°C/1 hr | 1. NZVI/MC700-304.3 2. VI/MC800-193.1 3. NZVI/MC900-185.9 | - | 1. U(VI)  (Aqueous) | (Lv et al., 2018) |
| Eggplant-Derived Biochar-Halloysite Nanocomposite | Greenhead of eggplant | H2SO4  Pd(OAc)2  N‐methylimidazole  (3‐chloropropyl)trimethoxysilane | 200 °C/ 15 h | 1. Hal-51 2. Char-22 3. Hal-Char-20 4. Hal-Char-IL-11 5. Hal-Char-SO3H-36 6. Hal-Char-CD-19 | - | catalytic activity for the hydrogenation of nitroarenes | (Sadjadi, Akbari, Léger, Monflier, & Heravi, 2019) |
| Ag-Biochar composite | banana peel | Azadirachta indica leaf extract  AgNO3. 2H2O | 300 °C/1 h | Ag-BBc- 142.5 | - | Congo Red Dye | (Kaushal, Saharan, Kumar, Sharma, & Umar, 2019) |
| BC-Gl-NSi nanocomposite | Liquidambar styraciflua fruit char | Silica gel | 450 °C/20 min | BC-Gl-NSi nanocomposite-60.754 | - | U(VI) | (Mahmoud et al., 2019) |
| Biochar-supported zero valent iron nanocomposite | Corn Stover | FeCl3 solution | 550 °C/ 120 min | 1. BC - 61.9 2. nZVI-BC- 16.7 | 1. BC -85.9% 2. nZVI-BC-71.9% | Anaerobic digestion (AD)  methane production from sewage sludge | (Min Zhang, Li, & Wang, 2019) |
| Novel Crayfish Shell Biochar Nanocomposites Loaded with Ag-TiO2 Nanoparticles | crayfish shell | 1. Tetra-n-butyl titanate (Ti(OC4H9)(4)) 2. silver nitrate (AgNO3) | 450 °C/2 h | - | - | Antibacterial activities of the nanocomposites to E. coli. | (Y. Zeng, Xue, Long, & Yan, 2019) |
| Algal biochar@La/Cu/Zr trimetallic nanocomposite | alga | 1. lanthanum nitrate 2. sodium citrate | 400 °C/7h | Algal biochar@La/Cu/Zr trimetallic nanocomposite -107.2 | - | malachite green  94% degradation at 4 h | (Sharma et al., 2019) |
| *g*-MoS2 decorated biochar | Rice straw | 1. sodium molybdate 2. thioacetamide | 500 °C/2h | g-MoS2 decorated biochar- 176.8 | - | TC | (Z. Zeng et al., 2019) |
| Sawdust Biochar/Fe3O4 Nanocomposites | sawdust | ferric sulfate  ferric chloride | 300 °C/3h | - | - | textile dye Reactive Blue 21 (RB21) -75% | (Nadeem et al., 2019) |
| Novel attapulgite/biochar (ATP/BC) nanocomposite | Rice straw | ZnCl2 | 450 °C/1h | 1. BC-11.13 2. ATP-104.42 3. ATP/BC-203.38 | 1. BC-40.07 2. ATP-18.10 3. ATP/BC-51.10 | 17 beta-estradiol  ATP/BC 154.23 mg/g | (Z. Yin et al., 2019) |
| Waste sludge biochar | petroleum waste sludge | R-sludge | 850 oC/1h | SBC0-143  SBCa-561  SBCb-569 | SBC0-23.6  SBCa-64.3  SBCb-85.4 | petroleum refinery wastewater (PRW)  TOC | (C. Chen et al., 2019) |

**References**

Agrafioti, E., Kalderis, D., & Diamadopoulos, E. (2014). Ca and Fe modified biochars as adsorbents of arsenic and chromium in aqueous solutions. *Journal of Environmental Management*. https://doi.org/10.1016/j.jenvman.2014.07.029

Chen, B., Chen, Z., & Lv, S. (2011). A novel magnetic biochar efficiently sorbs organic pollutants and phosphate. *Bioresource Technology*. https://doi.org/10.1016/j.biortech.2010.08.067

Chen, C., Yan, X., Xu, Y. Y., Yoza, B. A., Wang, X., Kou, Y., … Li, Q. X. (2019). Activated petroleum waste sludge biochar for efficient catalytic ozonation of refinery wastewater. *Science of the Total Environment*. https://doi.org/10.1016/j.scitotenv.2018.10.131

Chen, L., Chen, X. L., Zhou, C. H., Yang, H. M., Ji, S. F., Tong, D. S., … Chu, M. Q. (2017). Environmental-friendly montmorillonite-biochar composites: Facile production and tunable adsorption-release of ammonium and phosphate. *Journal of Cleaner Production*. https://doi.org/10.1016/j.jclepro.2017.04.050

Devi, P., & Saroha, A. K. (2014). Synthesis of the magnetic biochar composites for use as an adsorbent for the removal of pentachlorophenol from the effluent. *Bioresource Technology*. https://doi.org/10.1016/j.biortech.2014.07.062

Guan, X., Zhou, J., Ma, N., Chen, X., Gao, J., & Zhang, R. (2015). Studies on modified conditions of biochar and the mechanism for fluoride removal. *Desalination and Water Treatment*. https://doi.org/10.1080/19443994.2014.916230

Hu, X., Ding, Z., Zimmerman, A. R., Wang, S., & Gao, B. (2015). Batch and column sorption of arsenic onto iron-impregnated biochar synthesized through hydrolysis. *Water Research*, *68*, 206–216. https://doi.org/10.1016/j.watres.2014.10.009

Huang, Z. H., Zhang, F., Wang, M. X., Lv, R., & Kang, F. (2012). Growth of carbon nanotubes on low-cost bamboo charcoal for Pb(II) removal from aqueous solution. *Chemical Engineering Journal*. https://doi.org/10.1016/j.cej.2012.01.029

Inyang, M., Gao, B., Zimmerman, A., Zhou, Y., & Cao, X. (2015). Sorption and cosorption of lead and sulfapyridine on carbon nanotube-modified biochars. *Environmental Science and Pollution Research*. https://doi.org/10.1007/s11356-014-2740-z

Jung, C., Boateng, L. K., Flora, J. R. V., Oh, J., Braswell, M. C., Son, A., & Yoon, Y. (2015). Competitive adsorption of selected non-steroidal anti-inflammatory drugs on activated biochars: Experimental and molecular modeling study. *Chemical Engineering Journal*. https://doi.org/10.1016/j.cej.2014.11.076

Jung, K.-W., Jeong, T.-U., Hwang, M.-J., Kim, K., & Ahn, K.-H. (2015). Phosphate adsorption ability of biochar/Mg–Al assembled nanocomposites prepared by aluminum-electrode based electro-assisted modification method with MgCl2 as electrolyte. *Bioresource Technology*, *198*, 603–610. https://doi.org/https://doi.org/10.1016/j.biortech.2015.09.068

Kaushal, I., Saharan, P., Kumar, V., Sharma, A. K., & Umar, A. (2019). Superb sono-adsorption and energy storage potential of multifunctional Ag-Biochar composite. *Journal of Alloys and Compounds*. https://doi.org/10.1016/j.jallcom.2019.01.064

Li, J. H., Lv, G. H., Bai, W. B., Liu, Q., Zhang, Y. C., & Song, J. Q. (2016). Modification and use of biochar from wheat straw (Triticum aestivum L.) for nitrate and phosphate removal from water. *Desalination and Water Treatment*. https://doi.org/10.1080/19443994.2014.994104

Li, Y., Shao, J., Wang, X., Deng, Y., Yang, H., & Chen, H. (2014). Characterization of modified biochars derived from bamboo pyrolysis and their utilization for target component (furfural) adsorption. *Energy and Fuels*. https://doi.org/10.1021/ef500725c

Liang, J., Fang, Y., Luo, Y., Zeng, G., Deng, J., Tan, X., … Ye, S. (2019). Magnetic nanoferromanganese oxides modified biochar derived from pine sawdust for adsorption of tetracycline hydrochloride. *Environmental Science and Pollution Research*, *26*(6), 5892–5903. https://doi.org/10.1007/s11356-018-4033-4

Lin, L., Li, Z., Liu, X., Qiu, W., & Song, Z. (2019). Effects of Fe-Mn modified biochar composite treatment on the properties of As-polluted paddy soil. *Environmental Pollution*. https://doi.org/10.1016/j.envpol.2018.10.011

Lv, Z., Yang, S., Chen, L., Alsaedi, A., Hayat, T., & Chen, C. (2018). Nanoscale zero-valent iron/magnetite carbon composites for highly efficient immobilization of U(VI). *Journal of Environmental Sciences*. https://doi.org/https://doi.org/10.1016/j.jes.2018.06.001

Mahmoud, M. E., Khalifa, M. A., El Wakeel, Y. M., Header, M. S., El-Sharkawy, R. M., Kumar, S., & Abdel-Fattah, T. M. (2019). A novel nanocomposite of Liquidambar styraciflua fruit biochar-crosslinked-nanosilica for uranyl removal from water. *Bioresource Technology*. https://doi.org/10.1016/j.biortech.2019.01.052

Mohan, D., Kumar, H., Sarswat, A., Alexandre-Franco, M., & Pittman, C. U. (2014). Cadmium and lead remediation using magnetic oak wood and oak bark fast pyrolysis bio-chars. *Chemical Engineering Journal*. https://doi.org/10.1016/j.cej.2013.09.057

Nadeem, F., Jamil, N., Moazzam, A., Ahmad, S., Lateef, A., Khalid, A., … Munir, S. (2019). Synthesizing and Characterizing Sawdust Biochar/Fe3O4 Nanocomposites and its Potential Application in Textile Wastewater Treatment. *Polish Journal of Environmental Studies*. https://doi.org/10.15244/pjoes/91076

Qian, W., Zhao, A. Z., & Xu, R. K. (2013). Sorption of As(V) by Aluminum-Modified Crop Straw-Derived Biochars. *Water, Air, and Soil Pollution*. https://doi.org/10.1007/s11270-013-1610-5

Sadjadi, S., Akbari, M., Léger, B., Monflier, E., & Heravi, M. M. (2019). Eggplant-Derived Biochar-Halloysite Nanocomposite as Supports of Pd Nanoparticles for the Catalytic Hydrogenation of Nitroarenes in the Presence of Cyclodextrin. *ACS Sustainable Chemistry & Engineering*. https://doi.org/10.1021/acssuschemeng.8b05992

Sharma, G., Bhogal, S., Gupta, V. K., Agarwal, S., Kumar, A., Pathania, D., … Stadler, F. J. (2019). Algal biochar reinforced trimetallic nanocomposite as adsorptional/photocatalyst for remediation of malachite green from aqueous medium. *Journal of Molecular Liquids*. https://doi.org/10.1016/j.molliq.2018.11.070

Song, Z., Lian, F., Yu, Z., Zhu, L., Xing, B., & Qiu, W. (2014). Synthesis and characterization of a novel MnOx-loaded biochar and its adsorption properties for Cu2+ in aqueous solution. *Chemical Engineering Journal*. https://doi.org/10.1016/j.cej.2013.12.061

Tang, J., Lv, H., Gong, Y., & Huang, Y. (2015). Preparation and characterization of a novel graphene/biochar composite for aqueous phenanthrene and mercury removal. *Bioresource Technology*, *196*, 355–363. https://doi.org/10.1016/j.biortech.2015.07.047

Trakal, L., Veselská, V., Šafařík, I., Vítková, M., Číhalová, S., & Komárek, M. (2016). Lead and cadmium sorption mechanisms on magnetically modified biochars. *Bioresource Technology*, *203*, 318–324. https://doi.org/10.1016/j.biortech.2015.12.056

Usman, A. R. A., Sallam, A. S., Al-Omran, A., El-Naggar, A. H., Alenazi, K. K. H., Nadeem, M., & Al-Wabel, M. I. (2013). Chemically Modified Biochar Produced from Conocarpus Wastes: An Efficient Sorbent for Fe(II) Removal from Acidic Aqueous Solutions. *Adsorption Science & Technology*. https://doi.org/10.1260/0263-6174.31.7.625

Van Vinh, N., Zafar, M., Behera, S. K., & Park, H. S. (2015). Arsenic(III) removal from aqueous solution by raw and zinc-loaded pine cone biochar: equilibrium, kinetics, and thermodynamics studies. *International Journal of Environmental Science and Technology*. https://doi.org/10.1007/s13762-014-0507-1

Wang, Sheng-ye, Tang, Y., Li, K., Mo, Y., Li, H., & Gu, Z. (2014). Combined performance of biochar sorption and magnetic separation processes for treatment of chromium-contained electroplating wastewater. *Bioresource Technology*, *174*, 67–73. https://doi.org/https://doi.org/10.1016/j.biortech.2014.10.007

Wang, Shengsen, Gao, B., & Li, Y. (2016). Enhanced arsenic removal by biochar modified with nickel (Ni) and manganese (Mn) oxyhydroxides. *Journal of Industrial and Engineering Chemistry*. https://doi.org/10.1016/j.jiec.2016.03.048

Wang, Shengsen, Gao, B., Li, Y., Mosa, A., Zimmerman, A. R., Ma, L. Q., … Migliaccio, K. W. (2015). Manganese oxide-modified biochars: Preparation, characterization, and sorption of arsenate and lead. *Bioresource Technology*. https://doi.org/10.1016/j.biortech.2015.01.044

Wang, Shengsen, Gao, B., Zimmerman, A. R., Li, Y., Ma, L., Harris, W. G., & Migliaccio, K. W. (2015). Removal of arsenic by magnetic biochar prepared from pinewood and natural hematite. *Bioresource Technology*. https://doi.org/10.1016/j.biortech.2014.10.104

Wang, Y., Wang, X. J., Liu, M., Wang, X., Wu, Z., Yang, L. Z., … Zhao, J. F. (2012). Cr(VI) removal from water using cobalt-coated bamboo charcoal prepared with microwave heating. *Industrial Crops and Products*. https://doi.org/10.1016/j.indcrop.2012.02.015

Yan, L., Kong, L., Qu, Z., Li, L., & Shen, G. (2015). Magnetic biochar decorated with ZnS nanocrytals for Pb (II) removal. *ACS Sustainable Chemistry and Engineering*. https://doi.org/10.1021/sc500619r

Yao, Y., Gao, B., Chen, J., & Yang, L. (2013). Engineered biochar reclaiming phosphate from aqueous solutions: Mechanisms and potential application as a slow-release fertilizer. *Environmental Science and Technology*. https://doi.org/10.1021/es4012977

Yao, Y., Gao, B., Fang, J., Zhang, M., Chen, H., Zhou, Y., … Yang, L. (2014). Characterization and environmental applications of clay-biochar composites. *Chemical Engineering Journal*, *242*, 136–143. https://doi.org/10.1016/j.cej.2013.12.062

Yao, Y., Gao, B., Inyang, M., Zimmerman, A. R., Cao, X., Pullammanappallil, P., & Yang, L. (2011). Removal of phosphate from aqueous solution by biochar derived from anaerobically digested sugar beet tailings. *Journal of Hazardous Materials*. https://doi.org/10.1016/j.jhazmat.2011.03.083

Yi, S., Sun, Y., Hu, X., Xu, H., Gao, B., & Wu, J. (2018). Porous nano-cerium oxide wood chip biochar composites for aqueous levofloxacin removal and sorption mechanism insights. *Environmental Science and Pollution Research*, *25*(26), 25629–25637. https://doi.org/10.1007/s11356-016-8342-1

Yi, Y., Li, C., Zhao, L., Du, X., Gao, L., Chen, J., … Zeng, G. (2018). The synthetic evaluation of CuO-MnOx-modified pinecone biochar for simultaneous removal formaldehyde and elemental mercury from simulated flue gas. *Environmental Science and Pollution Research*, *25*(5), 4761–4775. https://doi.org/10.1007/s11356-017-0855-8

Yin, D., Wang, X., Peng, B., Tan, C., & Ma, L. Q. (2017). Effect of biochar and Fe-biochar on Cd and As mobility and transfer in soil-rice system. *Chemosphere*, *186*, 928–937. https://doi.org/10.1016/j.chemosphere.2017.07.126

Yin, Z., Liu, Y., Tan, X., Jiang, L., Zeng, G., Liu, S., … Li, M. (2019). Adsorption of 17Β-estradiol by a novel attapulgite/biochar nanocomposite: Characteristics and influencing factors. *Process Safety and Environmental Protection*. https://doi.org/10.1016/j.psep.2018.10.022

Zeng, Y., Xue, Y., Long, L., & Yan, J. (2019). Novel Crayfish Shell Biochar Nanocomposites Loaded with Ag-TiO2 Nanoparticles Exhibit Robust Antibacterial Activity. *Water, Air, and Soil Pollution*. https://doi.org/10.1007/s11270-019-4104-2

Zeng, Z., Ye, S., Wu, H., Xiao, R., Zeng, G., Liang, J., … Song, B. (2019). Research on the sustainable efficacy of g-MoS2 decorated biochar nanocomposites for removing tetracycline hydrochloride from antibiotic-polluted aqueous solution. *Science of the Total Environment*. https://doi.org/10.1016/j.scitotenv.2018.08.108

Zhang, F., Wang, X., Xionghui, J., & Ma, L. (2016). Efficient arsenate removal by magnetite-modified water hyacinth biochar. *Environmental Pollution*, *216*, 575–583. https://doi.org/https://doi.org/10.1016/j.envpol.2016.06.013

Zhang, L., Guo, J., Huang, X., Wang, W., Sun, P., Li, Y., & Han, J. (2019). Functionalized biochar-supported magnetic MnFe 2 O 4 nanocomposite for the removal of Pb(ii) and Cd(ii). *RSC Advances*. https://doi.org/10.1039/c8ra09061k

Zhang, Min, Li, J., & Wang, Y. (2019). Impact of biochar-supported zerovalent iron nanocomposite on the anaerobic digestion of sewage sludge. *Environmental Science and Pollution Research*. https://doi.org/10.1007/s11356-019-04479-6

Zhang, Ming, & Gao, B. (2013). Removal of arsenic, methylene blue, and phosphate by biochar/AlOOH nanocomposite. *Chemical Engineering Journal*. https://doi.org/10.1016/j.cej.2013.04.077

Zhang, Ming, Gao, B., Varnoosfaderani, S., Hebard, A., Yao, Y., & Inyang, M. (2013). Preparation and characterization of a novel magnetic biochar for arsenic removal. *Bioresource Technology*. https://doi.org/10.1016/j.biortech.2012.11.132

Zhang, Ming, Gao, B., Yao, Y., Xue, Y., & Inyang, M. (2012). Synthesis of porous MgO-biochar nanocomposites for removal of phosphate and nitrate from aqueous solutions. *Chemical Engineering Journal*. https://doi.org/10.1016/j.cej.2012.08.052

Zhao, X., Ouyang, W., Hao, F., Lin, C., Wang, F., Han, S., & Geng, X. (2013). Properties comparison of biochars from corn straw with different pretreatment and sorption behaviour of atrazine. *Bioresource Technology*. https://doi.org/10.1016/j.biortech.2013.08.042

Zhou, Y., Gao, B., Zimmerman, A. R., Fang, J., Sun, Y., & Cao, X. (2013). Sorption of heavy metals on chitosan-modified biochars and its biological effects. *Chemical Engineering Journal*. https://doi.org/10.1016/j.cej.2013.07.036

Zhu, X., Liu, Y., Qian, F., Zhou, C., Zhang, S., & Chen, J. (2014). Preparation of magnetic porous carbon from waste hydrochar by simultaneous activation and magnetization for tetracycline removal. *Bioresource Technology*. https://doi.org/10.1016/j.biortech.2013.12.019

1. **Corresponding author: Prof. Pu Shengyan*

   *State Key Laboratory of Geohazard Prevention and Geoenvironment Protection (Chengdu University of Technology), Chengdu 610059, P. R. China. Tel. /fax: +86 (0) 28 8407 3253; E-mail: pushengyan@gmail.com; pushengyan13@cdut.cn* [↑](#footnote-ref-1)
